# Supplementary material for: Sustainable Bioactive Composite of Glehnia littoralis Extracts for Osteoblast Differentiation and Bone Formation
Source: MDPI journal article supplement (doi:10.3390/pr11051491), 2023-05-15
Supplement: s1 [file s1]

**Table S1.** Pearson's correlation coefficient among antioxidant activities, total phenolic contents and total flavonoid contents.

| <sup>1</sup> Variables | DPPH     | ABTS     | TPC      | TFC      |
|------------------------|----------|----------|----------|----------|
| DPPH                   | <b>1</b> | 0.894    | 0.581    | 0.386    |
| ABTS                   |          | <b>1</b> | 0.870    | 0.725    |
| TPC                    |          |          | <b>1</b> | 0.969    |
| TFC                    |          |          |          | <b>1</b> |

<sup>1</sup>TPC, total phenolic content; TFC. Total flavonoid content; DPPH, 1,1-Diphenyl-2-Picrylhydrazyl, 2,2 -Azino-bis-3-Ethylbenzthiazoline-6-Sulphonic Acid (ABTS) Assay.
